# Supplementary material for: Electron transfer between carbon dots and tetranuclear Dawson-derived sandwich polyanions
Source: Royal Society of Chemistry journal article supplement (doi:10.1039/d2cp00447j), 2022-01-01
Supplement: d2cp00447j1.pdf [file d2cp00447j1.pdf]

## Supporting Information:

# Electron transfer between carbon dots and tetranuclear Dawson-derived sandwich polyanions

*Antonino Madonia,<sup>1</sup> Alice Sciortino,<sup>2</sup> Mercè Martin-Sabi,<sup>1</sup> Marco Cannas,<sup>2</sup> Souad Ammar,<sup>1</sup> Fabrizio  
Messina,<sup>2,3\*</sup> and Delphine Schaming<sup>1,\*</sup>*

<sup>1</sup> Université de Paris, ITODYS, UMR 7086 CNRS, 15 rue Jean-Antoine de Baïf, 75013 Paris, France

<sup>2</sup> Università degli Studi di Palermo, DiFC, via Archirafi 36, 90100 Palermo, Italy

<sup>3</sup> Università degli Studi di Palermo, CHAB-ATeN Center, Viale delle Scienze, Edificio 18, 90128  
Palermo, Italy

E-mail: delphine.schaming@u-paris.fr; fabrizio.messina@unipa.it

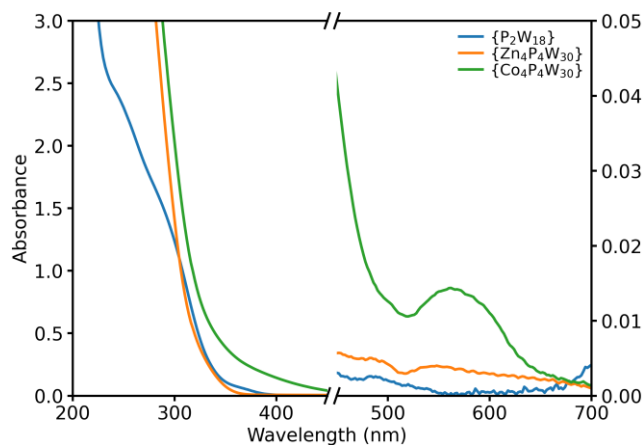

Figure S1: Absorbance spectra of aqueous solutions of the polyoxometalates used in this work at a  $50 \mu\text{M}$  concentration. While both  $\{\text{P}_2\text{W}_{18}\}$  and  $\{\text{Zn}_4\text{P}_4\text{W}_{30}\}$  only present spectral features found below 400 nm, polyoxometalate  $\{\text{Co}_4\text{P}_4\text{W}_{30}\}$  displays an absorbance tail extending up to 500 nm and a weak band peaking at 565 nm.

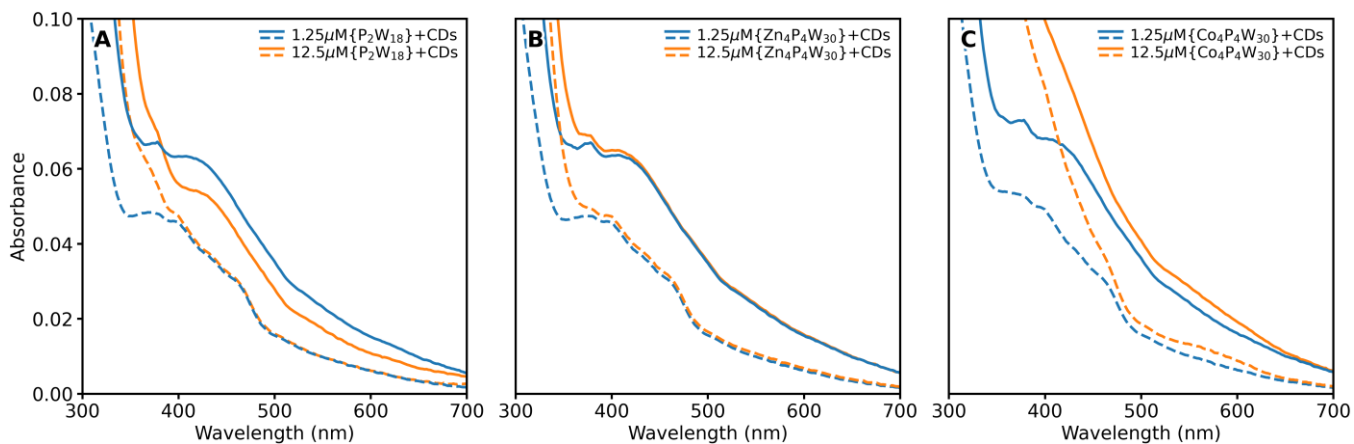

Figure S2: Comparison between the absorption spectra of CDs aqueous solutions to which either  $1.25 \mu\text{M}$  or  $12.5 \mu\text{M}$  POM were added (continuous curves) and the absorption expected if the resulting spectra were only caused by additive contributions (dashed lines); the latter was calculated as sum between the absorbance of an aqueous solution only containing CDs and the absorbance of an aqueous solution only containing POMs at the indicated concentration; data is relative to polyoxometalates: A)  $\{\text{P}_2\text{W}_{18}\}$ , B)  $\{\text{Zn}_4\text{P}_4\text{W}_{30}\}$ , and C)  $\{\text{Co}_4\text{P}_4\text{W}_{30}\}$ .

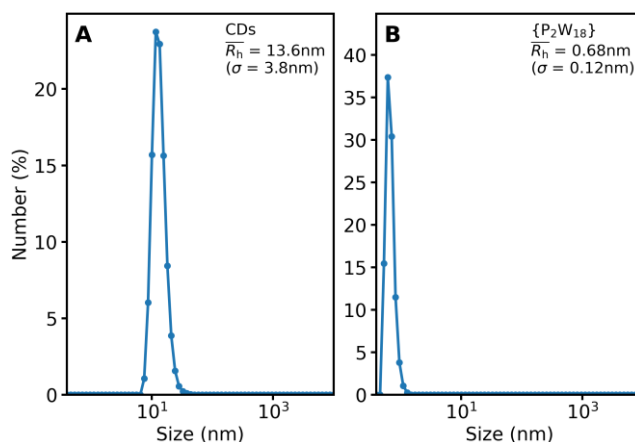

Figure S3: Size number distribution of A) CDs and B)  $\{P_2W_{18}\}$  as obtained via DLS measurements; the indicated hydrodynamic radii  $R_h$  have been calculated from the average size weighed on the distribution; the relative standard deviation  $\sigma$  is reported.

| $R_{CDs}$ (nm) | $R_{POM}$ (nm)    | $D_{CDs}$ ( $m^2s^{-1}$ )     | $D_{POM}$ ( $m^2s^{-1}$ )     | $K$ ( $M^{-1}$ ) |
|----------------|-------------------|-------------------------------|-------------------------------|------------------|
| $13.6 \pm 0.4$ | $0.683 \pm 0.012$ | $(181 \pm 5) \times 10^{-13}$ | $(360 \pm 6) \times 10^{-12}$ | $271 \pm 12$     |

Table S1: Diffusion limited quenching constant ( $K$ ) and the parameters used to obtain it relative to the interaction between  $\{P_2W_{18}\}$  and CDs; the interacting species radii ( $R$ ) corresponds to the hydrodynamic radii obtained from the DLS size distribution; diffusion coefficients ( $D$ ) have been calculated from the Einstein equation; diffusion limited quenching constant calculated from the Smoluchowski equation.

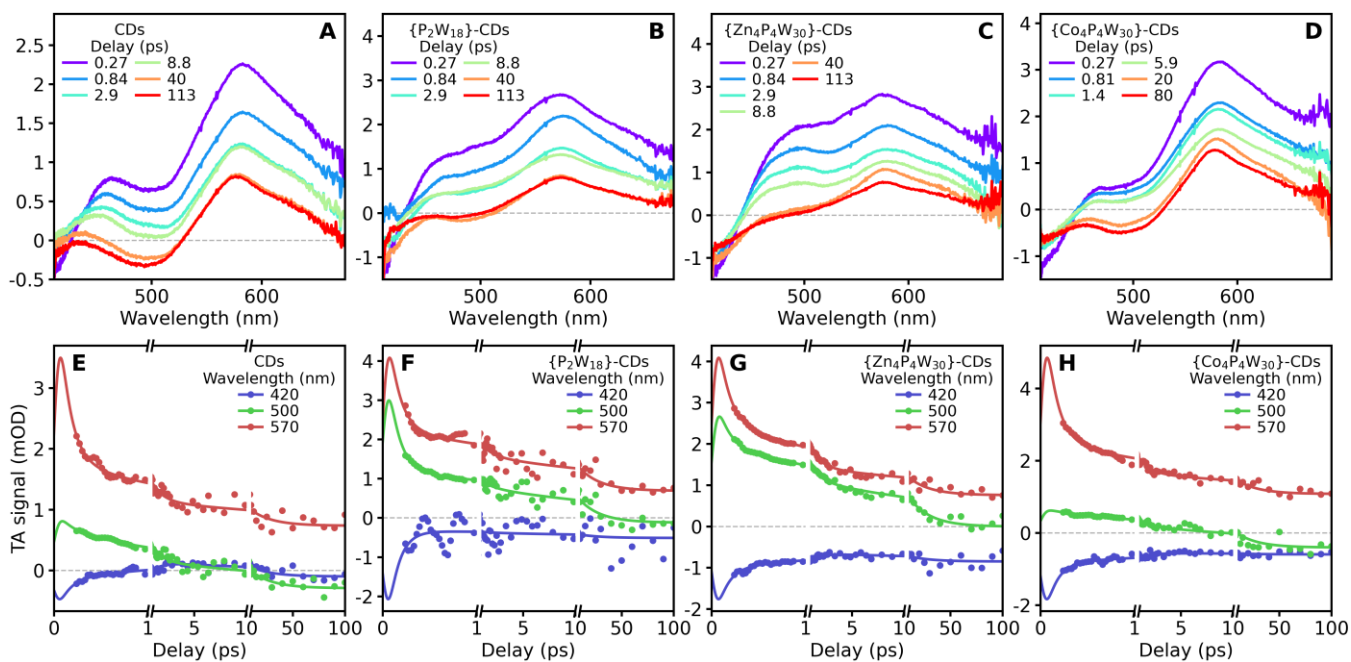

Figure S4: Ultrafast transient absorbance spectra at different delays from excitation (A, B, C and D) and traces taken at different wavelengths (E, F, G and H) of a CDs solution excited by a 400 nm femto-second laser pulse, either in the absence of POMs (A and E), in the presence of 125  $\mu$ M of  $\{P_2W_{18}\}$  (B and F), in the presence of 125  $\mu$ M of  $\{Zn_4P_4W_{30}\}$  (C and G) or in the presence of 125  $\mu$ M of  $\{Co_4P_4W_{30}\}$  (D and H). The best fitting multi-exponential decay curves obtained via a global least-squares minimization procedure are shown.

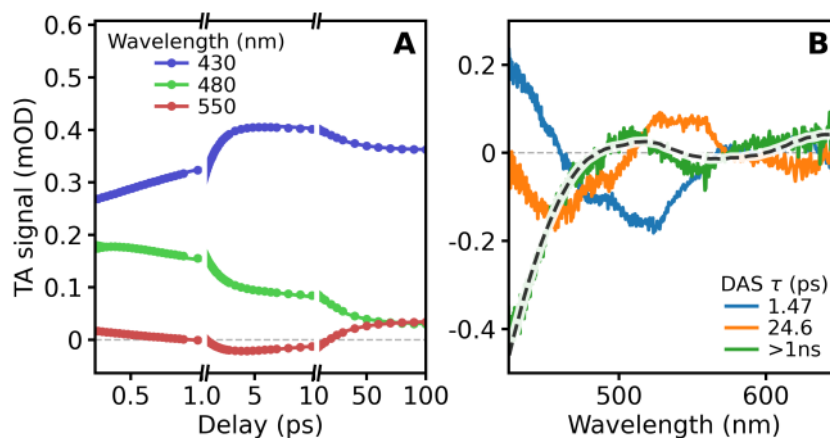

Figure S5: A) Traces and relative least-squares fitting curves taken at different wavelengths and B) decays associated spectra of the difference between the TA of a 125  $\mu\text{M}$   $\{\text{Co}_4\text{P}_4\text{W}_{30}\}$ -CDs complexes solution and the TA of a bare CDs solution.

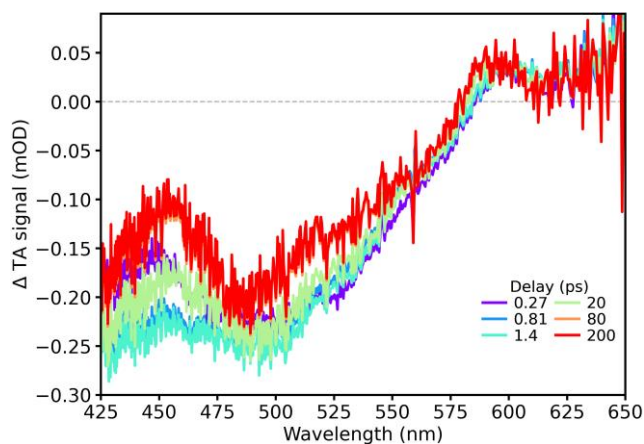

Figure S6: Spectra at different delays from excitation obtained as difference between the TA signal of  $\{\text{Co}_4\text{P}_4\text{W}_{30}\}$ -CDs complexes obtained at a 1.25  $\mu\text{M}$   $\{\text{Co}_4\text{P}_4\text{W}_{30}\}$  concentration and the TA signal of CDs.
